# Supplementary material
Source: PubMed Central journal article supplement (PMC7458155)
Supplement: NIHMS1578601-supplement-1.pdf [file NIHMS1578601-supplement-1.pdf]

**Appendix**  
**Accountable Care Organizations and Preventable Hospitalizations Among Patients With Depression**  
**Barath et al.**

**Appendix Table 1.** Sample Characteristics by Hospital's Accountable Care Organization (ACO) Affiliation Among Discharges With Co-Existing Depression, 2015

| Characteristics                                 | ACO-affiliated<br>(n=206,446)<br>% (SD) | ACO-unaffiliated<br>(n=193,776)<br>% (SD) | p-value          |
|-------------------------------------------------|-----------------------------------------|-------------------------------------------|------------------|
| <b>Potentially preventable hospitalizations</b> |                                         |                                           |                  |
| Rate                                            | 8.8 (0.28)                              | 10.7 (0.31)                               | <b>&lt;0.001</b> |
| Count (n)                                       | 18,167                                  | 20,734                                    |                  |
| <b>Individual characteristics</b>               |                                         |                                           |                  |
| <b>Race/Ethnicity</b>                           |                                         |                                           |                  |
| NH white                                        | 79.3 (0.41)                             | 81 (0.39)                                 | <b>&lt;0.001</b> |
| NH African American                             | 11.5 (0.32)                             | 10.3 (0.30)                               | <b>&lt;0.001</b> |
| NH Asian or Pacific Islander                    | 0.9 (0.10)                              | 0.5 (0.07)                                | <b>&lt;0.001</b> |
| NH Native American                              | 0.8 (0.09)                              | 0.8 (0.09)                                | 0.990            |
| NH other/multi-race                             | 1.1 (0.10)                              | 0.9 (0.10)                                | <b>&lt;0.001</b> |
| Hispanic (any race)                             | 6.5 (0.25)                              | 6.4 (0.25)                                | 0.302            |
| <b>Age, years</b>                               |                                         |                                           |                  |
| 18–24                                           | 4.2 (0.20)                              | 3.7 (0.19)                                | <b>&lt;0.001</b> |
| 25–34                                           | 11.4 (0.32)                             | 10 (0.30)                                 | <b>&lt;0.001</b> |
| 35–44                                           | 12.8 (0.33)                             | 12.3 (0.33)                               | <b>&lt;0.001</b> |
| 45–54                                           | 19.4 (0.40)                             | 19.4 (0.40)                               | 0.913            |
| 55–64                                           | 22.9 (0.42)                             | 23.7 (0.43)                               | <b>&lt;0.001</b> |
| 65–74                                           | 17.6 (0.38)                             | 18.5 (0.39)                               | <b>&lt;0.001</b> |
| ≥75                                             | 11.8 (0.32)                             | 12.4 (0.33)                               | <b>&lt;0.001</b> |
| Female                                          | 66.3 (0.47)                             | 65.6 (0.48)                               | <b>&lt;0.001</b> |
| Chronic conditions (mean)                       | 7.30 (3.42)                             | 7.32 (3.35)                               | <b>0.020</b>     |
| <b>Expected payer</b>                           |                                         |                                           |                  |
| Medicare                                        | 41.2 (0.49)                             | 43.1 (0.50)                               | <b>&lt;0.001</b> |
| Medicaid                                        | 21.5 (0.41)                             | 21.4 (0.41)                               | 0.363            |
| Private insurance                               | 31.0 (0.46)                             | 27.7 (0.45)                               | <b>&lt;0.001</b> |
| Self-pay                                        | 3.0 (0.17)                              | 3.7 (0.19)                                | <b>&lt;0.001</b> |
| No charge                                       | 0.5 (0.07)                              | 0.7 (0.09)                                | <b>&lt;0.001</b> |
| Other                                           | 2.8 (0.17)                              | 3.3 (0.18)                                | <b>&lt;0.001</b> |
| <b>Median income of ZIP code</b>                |                                         |                                           |                  |
| \$1–\$41,999                                    | 27.9 (0.45)                             | 37.0 (0.48)                               | <b>&lt;0.001</b> |
| \$42,000–\$51,999                               | 25.9 (0.44)                             | 26.3 (0.44)                               | <b>0.006</b>     |
| \$52,000–\$67,999                               | 24.2 (0.43)                             | 22.6 (0.42)                               | <b>&lt;0.001</b> |
| ≥\$68,000                                       | 22.0 (0.41)                             | 14.0 (0.35)                               | <b>&lt;0.001</b> |
| <b>Hospital characteristics</b>                 |                                         |                                           |                  |
| <b>Hospital ownership</b>                       |                                         |                                           |                  |
| For-profit                                      | 3.3 (0.18)                              | 15.1 (0.36)                               | <b>&lt;0.001</b> |
| Non-for-profit                                  | 87.8 (0.33)                             | 70.4 (0.46)                               | <b>&lt;0.001</b> |
| Government                                      | 8.9 (0.28)                              | 14.5 (0.35)                               | <b>&lt;0.001</b> |
| <b>Bed size</b>                                 |                                         |                                           |                  |
| Small ≤50                                       | 2.4 (0.15)                              | 3.4 (0.18)                                | <b>&lt;0.001</b> |
| Medium 51–200                                   | 20.9 (0.41)                             | 26.5 (0.44)                               | <b>&lt;0.001</b> |

**Appendix**  
**Accountable Care Organizations and Preventable Hospitalizations Among Patients With Depression**  
**Barath et al.**

|                |             |             |                  |
|----------------|-------------|-------------|------------------|
| Large >200     | 76.7 (0.42) | 70.1 (0.46) | <b>&lt;0.001</b> |
| Teaching       | 21.0 (0.41) | 17.5 (0.38) | <b>&lt;0.001</b> |
| Safety net     | 14.2 (0.35) | 10.6 (0.31) | <b>&lt;0.001</b> |
| Rural          | 5.3 (0.22)  | 11.6 (0.32) | <b>&lt;0.001</b> |
| State          |             |             |                  |
| Arizona        | 11.3 (0.32) | 3.3 (0.18)  | <b>&lt;0.001</b> |
| Colorado       | 3.5 (0.18)  | 10.2 (0.30) | <b>&lt;0.001</b> |
| Florida        | 13.6 (0.34) | 27.8 (0.45) | <b>&lt;0.001</b> |
| Kentucky       | 6.7 (0.25)  | 13.0 (0.34) | <b>&lt;0.001</b> |
| Maryland       | 9.1 (0.29)  | 9.6 (0.29)  | <b>&lt;0.001</b> |
| North Carolina | 17.3 (0.38) | 14.0 (0.35) | <b>&lt;0.001</b> |
| New Jersey     | 10.0 (0.30) | 1.9 (0.14)  | <b>&lt;0.001</b> |
| Oregon         | 5.1 (0.22)  | 10.0 (0.30) | <b>&lt;0.001</b> |
| Rhode Island   | 0.5 (0.07)  | 2.4 (0.15)  | <b>&lt;0.001</b> |
| Washington     | 13.2 (0.34) | 4.1 (0.20)  | <b>&lt;0.001</b> |
| Wisconsin      | 11.3 (0.32) | 3.3 (0.18)  | <b>&lt;0.001</b> |

*Notes:* Total sample (N=400,222) includes discharges for adults with coexisting depression from 682 hospitals in 11 states (Florida, Arizona, Colorado, Kentucky, Maryland, North Carolina, New Jersey, Oregon, Rhode Island, Washington, and Wisconsin). Potentially preventable hospitalizations were measured using the AHRQ algorithm for any of the following chronic condition Prevention Quality Indicators (PQIs): uncontrolled diabetes (PQI 14), diabetes related short-term and long-term complications (PQI 1, PQI 3); chronic obstructive pulmonary disease or asthma (PQI 5 and PQI 15), hypertension (PQI 7), and heart failure (PQI 8). Boldface indicates statistical significance ( $p<0.05$ ). Summary: Overall PPHs for chronic conditions and coexisting depression were lower among ACO-affiliated hospitals (9%) compared to ACO-unaffiliated (11%). PPHs with co-existing depression in ACO-affiliated hospitals were more likely to be for adults who were African American, Asian, or other/multi-race patients; younger (18–44 years); female; with private health insurance; and live in higher earning ZIP codes than their counterparts in ACO-unaffiliated hospitals. ACO-affiliated hospitals were more likely to be not-for-profit, large (>200 beds), safety net providers, teaching hospitals, and in urban areas.

*Sources:* 2015 HCUP SID, 2015 AHA annual survey; and the 2015 AHA Care Systems and Payment Survey.

ACO, accountable care organization; NH, non-Hispanic; AHRQ, Agency for Healthcare Research and Quality; HCUP, Healthcare Cost and Utilization Project; SID, State Inpatient Databases; AHA, American Hospital Association.
